# Supplementary material for: Targeting Cellular Retinoic Acid Binding Protein 1 with Retinoic Acid-like Compounds to Mitigate Motor Neuron Degeneration
Source: MDPI journal article supplement (doi:10.3390/ijms24054980), 2023-03-04
Supplement: s1 [file s1]

**A**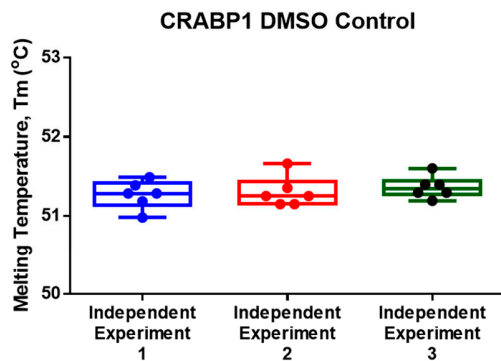**B**

|                       | DSF<br>Exp. 1 | DSF<br>Exp. 2 | DSF<br>Exp. 3 |
|-----------------------|---------------|---------------|---------------|
| Mean Tm<br>(°C)       | 51.27         | 51.30         | 51.36         |
| Standard<br>Deviation | 0.18          | 0.19          | 0.14          |

**C**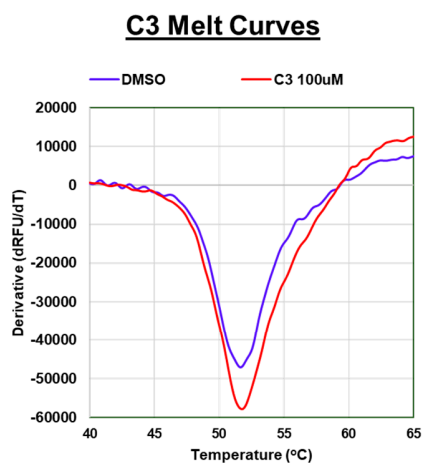

| C3 Tm Shift Values |         |              |
|--------------------|---------|--------------|
| Condition          | Tm (°C) | $\Delta T_m$ |
| DMSO               | 51.36   | --           |
| 100uM              | 51.62   | 0.26         |

**D**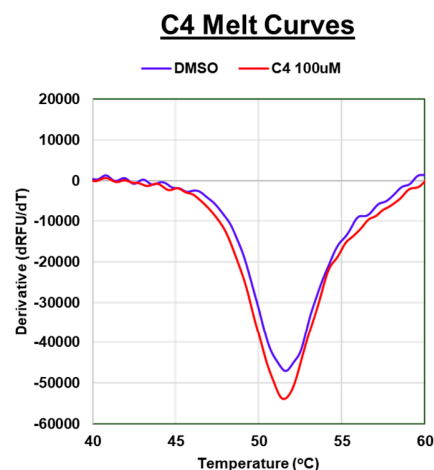

| C4 Tm Shift Values |         |              |
|--------------------|---------|--------------|
| Condition          | Tm (°C) | $\Delta T_m$ |
| DMSO               | 51.36   | --           |
| 100uM              | 51.45   | 0.09         |

**Supplementary Figure S1. CRABP1 DMSO controls across independent and technical replicates and C3 and C4 in CRABP1 ligand binding DSF experiments.** A) Box and whisker plots of the vehicle (DMSO) controls for CRABP1 melting temperature ( $T_m$ ) across 3 independent experiments. Each individual data point represents a technical replicate. B) Mean  $T_m$  and standard deviation (SD) for each independent DMSO control. Error bars are represented as  $\pm$  SD. C-D) Representative melt curve profile and  $T_m$  for C3 (100uM,  $\Delta T_m = 0.26$ ) and C4 (100uM,  $\Delta T_m = 0.09$ ) DSF experiments.

**A**

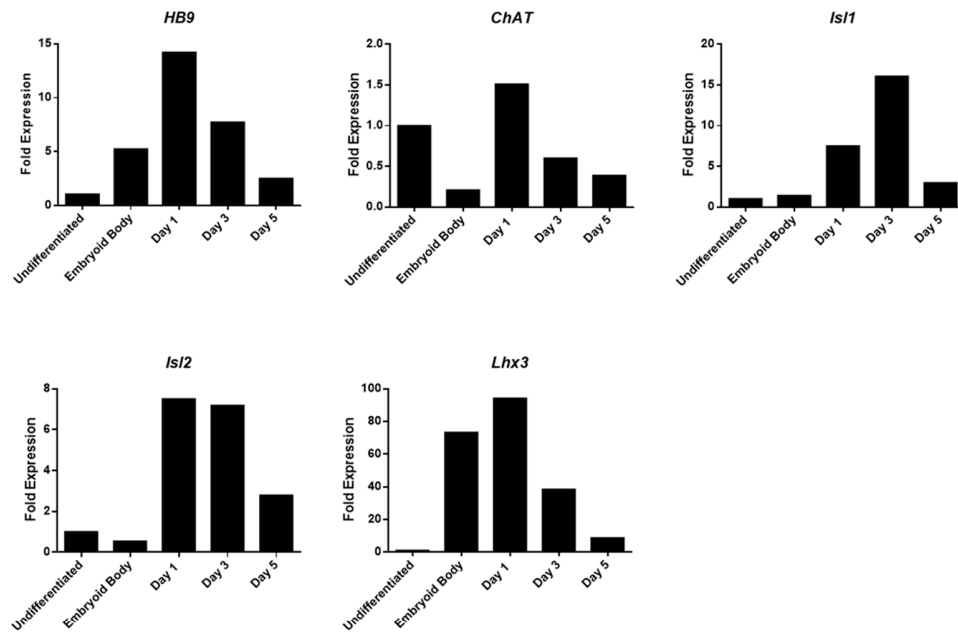

**B**

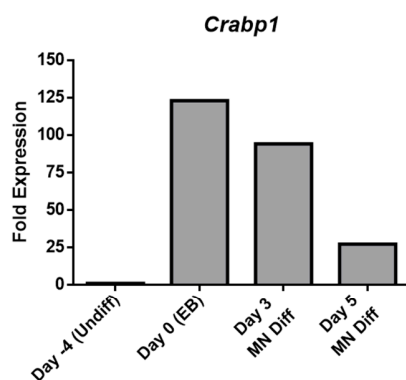

| <b><i>Crabp1</i> Gene Expression</b> |              |             |
|--------------------------------------|--------------|-------------|
| Stage                                | Day in Vitro | Avg. Raw Ct |
| Undifferentiated P19                 | -4           | 25.3        |
| EB                                   | 0            | 17.8        |
| Motor Neuron                         | 3            | 19.1        |
| Motor Neuron                         | 5            | 20.5        |

**C**

| <b><i>Crabp1</i> Gene Expression</b> |              |            |
|--------------------------------------|--------------|------------|
| Stage                                | Day in Vitro | Avg Raw CT |
| Undifferentiated P19                 | Day -4       | 24.7       |
| EB                                   | Day 0        | 18.5       |
| Motor Neuron                         | Day 1        | 19.4       |
| Motor Neuron                         | Day 3        | 19.5       |

**Supplementary Figure S2. Relevant gene expression patterns of MN, spinal neuron markers, and *Crabp1* during the course of P19-MN differentiation.** A) qPCR data of MN-specific markers, *HB9*, *ChAT*, *Isl1*, *Isl2*, and *Lhx3*, during P19-MN differentiation. B) qPCR data and raw Ct values observed for endogenous *Crabp1* expression during P19-MN differentiation. C) Raw Ct values for qPCR data presented in main Figure 3D.

**Supplementary Table S1.** Primer sequences used in qPCR analysis

| <b>Gene Name</b> | <b>Primer Direction</b> | <b>Primer Sequence</b>          |
|------------------|-------------------------|---------------------------------|
| <i>HB9</i>       | Forward                 | 5'-TTCCAGAACCGCCGAATGAA-3'      |
|                  | Reverse                 | 5'-CCTTCTGCTTCTCCGCCTC-3'       |
| <i>ChAT</i>      | Forward                 | 5'-ACTGGGTGTCTGAGTACTGG-3'      |
|                  | Reverse                 | 5'-TTGGAAGCCATTTTGACTAT-3'      |
| <i>Crabp1</i>    | Forward                 | 5'-ACCTGGAAGATGCGCAGCAGCGAG-3'  |
|                  | Reverse                 | 5'-TAAACTCCTGCATTTGCGTCCGTCC-3' |
| <i>Isl2</i>      | Forward                 | 5'-GTGCTTCGTGAGAGACGGGAAA -3'   |
|                  | Reverse                 | 5'-AGCACTCGATGTGGTACACGCT-3'    |
| <i>Isl1</i>      | Forward                 | 5'-GTAGAGGTGCAAAGTTACCAGCC -3'  |
|                  | Reverse                 | 5'-TTAGAGCCTGGTCCTCCTTCTG -3'   |
| <i>Lhx3</i>      | Forward                 | 5'-GAAGTTCAGGGTCGGAGGGC-3'      |
|                  | Reverse                 | 5'-TGCACACATCGGGATCTCTC-3'      |
